# Supplementary material for: A stable ultra-microporous hafnium-based metal–organic framework with high performance for CO2 adsorption and separation
Source: Royal Society of Chemistry journal article supplement (doi:10.1039/d3ce01022h), 2023-01-01
Supplement: d3ce01022h1.pdf [file d3ce01022h1.pdf]

## Electronic Supplementary Information

### **A Stable Ultra-Microporous Hafnium-Based Metal-Organic Framework with High Performance for CO<sub>2</sub> Adsorption and Separation**

*Yali Ma, Haitang Wang, Hailong Wang, Jiani Wang, Shuaiyu Jiang, Qiang Zheng, Songyan Jia, Xue Li\*, Tianyi Ma\**

Prof. Y. Ma, Dr. H. Wang, Dr. H. Wang, Dr. J. Wang, Prof. Y. Q. Zheng, Prof. Y. Jia Prof. X. Li

College of Chemical Engineering, Shenyang University of Chemical Technology, Shenyang 110142, P. R. China

Prof. T. Ma, Y Jiang

School of Science, RMIT University, Melbourne, VIC 3000, Australia

E-mail: [tianyi.ma@rmit.edu.au](mailto:tianyi.ma@rmit.edu.au)

## **S1 Experimental Section**

### ***Materials and method***

All chemicals were purchased from commercial sources and used without any further purification. Zirconium chloride ( $\text{ZrCl}_4$ , 98 %, Aladdin), N, N-dimethylformamide (DMF, AR, Sinopharm Chemical Reagent Co. Ltd.), Acetic acid ( $\text{CH}_3\text{COOH}$ , AR, Fuyu Reagent), acetonitrile (AR, Fuyu Reagent), methanol (AR, Fuyu Reagent), ethanol (AR, Fuyu Reagent), acetone (AR, Fuyu Reagent). X-ray diffraction (XRD) patterns were obtained using a Bruker (Germany) D8 Advance diffractometer with  $\text{Cu K}\alpha$  radiation ( $\lambda = 1.5418 \text{ \AA}$ ) from  $5^\circ$  to  $40^\circ$  at 30 kV and 10 mA under a scan rate of  $0.02 \text{ degree min}^{-1}$ . Thermogravimetric analysis (TGA, METTLER TOLEDO TGA/SDTA851) were performed to analyze the structure with a heating rate of  $5 \text{ }^\circ\text{C min}^{-1}$  under air atmosphere. Vario MICRO (Elementar, Germany) was used to perform the Elemental analyses (C, H, and N). The  $\text{N}_2$  adsorption measurement was performed using Micromeritics ASAP 2420.  $\text{CO}_2$ ,  $\text{CH}_4$  and  $\text{C}_2\text{H}_6$  adsorption measurements were tested on the Micromeritics 3Flex instrument.

### ***Synthesis steps of Hf-MOF***

Typically, 0.5 mL of DMF solution with  $\text{HfCl}_4$  (40.80 mg, 0.10 mmol) and 0.5 mL of DMF solution with 1,3-di(4-carboxyphenyl)benzene ( $\text{H}_2\text{DCPB}$ ) (30 mg, 0.10 mmol) were mixed together in a 10 mL glass vial. Following that, adding 0.2 mL of acetic acid and the solution was sealed and heated at  $120 \text{ }^\circ\text{C}$  for 4 days. The product was collected by centrifugation at 3,000 rpm for 2 min and washed with DMF for several times. After that, the solids were dried at  $60 \text{ }^\circ\text{C}$  in a vacuum for 12 hours to get the novel MOFs (denoted as Hf-MOF) with a yield of 80%, based on the using amount of  $\text{H}_2\text{DCPB}$  ligands.

### *X-ray crystallography*

Single crystal of  $C_{120}H_{72}Hf_6O_{32}$  was obtained via a Bruker Apex II CCD diffractometer using graphite-monochromated Mo-K $\alpha$  radiation ( $\lambda=0.71073$  Å) radiation at room temperature. Using Olex 2,<sup>[26]</sup> the structure was solved with the SHELXT<sup>[27]</sup> structure solution program using intrinsic phasing and refined with the SHELXL<sup>[28]</sup> refinement package using least squares minimisation. The final formula of Hf-MOF was defined by combining the crystallographic data, elemental and TGA results. Crystal data, structure refinement and selected bond lengths of the Hf-MOF was displayed in Table S1. The topology of the Hf-MOF was calculated based on the software of TOPOS 4.0.<sup>[29]</sup>

### **Gas adsorption and separation**

Before the gas adsorption measurements, the samples should be fully activated. To completely remove the guest solvent molecules, the samples were soaked in acetonitrile, and exchanged with fresh acetonitrile for several times in 4 days. Then, before the gas adsorption measurements, the samples were dried using the ‘outgas’ function of the Micromeritics analyzer for 10 h at 90°C. The N<sub>2</sub> adsorption measurements were carried out on a Micromeritics ASAP 2420 instrument. Adsorption measurements of CO<sub>2</sub>, CH<sub>4</sub>, C<sub>2</sub>H<sub>6</sub> were carried out on a Micromeritics 3-Flex instrument.

## **S2. Calculation procedures of selectivity from IAST**

The measured experimental data is excess loadings ( $q^{ex}$ ) of the pure components CO<sub>2</sub>, CH<sub>4</sub> and C<sub>2</sub>H<sub>6</sub> for Hf-MOFs, which should be converted to absolute loadings ( $q$ ) firstly.

$$q = q^{ex} + \frac{pV_{pore}}{ZRT}$$

Here  $Z$  is the compressibility factor. The Peng-Robinson equation was used to estimate the value of compressibility factor to obtain the absolute loading, while the measured pore volume of Hf-MOFs are also necessary.

The dual-site Langmuir-Freundlich equation is used for fitting the isotherm data at 298 K.

$$q = q_{m_1} \times \frac{b_1 \times p^{1/n_1}}{1 + b_1 \times p^{1/n_1}} + q_{m_2} \times \frac{b_2 \times p^{1/n_2}}{1 + b_2 \times p^{1/n_2}}$$

Here  $p$  is the pressure of the bulk gas at equilibrium with the adsorbed phase (kPa),  $q$  is the adsorbed amount per mass of adsorbent (mol kg<sup>-1</sup>),  $q_{m_1}$  and  $q_{m_2}$  are the saturation capacities of sites 1 and 2 (mol kg<sup>-1</sup>),  $b_1$  and  $b_2$  are the affinity coefficients of sites 1 and 2 (1/kPa),  $n_1$  and  $n_2$  are the deviations from an ideal homogeneous surface.

The selectivity of preferential adsorption of component 1 over component 2 in a mixture containing 1 and 2, perhaps in the presence of other components too, can be formally defined as

$$S = \frac{q_1/q_2}{p_1/p_2}$$

$q_1$  and  $q_2$  are the absolute component loadings of the adsorbed phase in the mixture. These component loadings are also termed the uptake capacities. We calculate the values of  $q_1$  and  $q_2$  using the Ideal Adsorbed Solution Theory (IAST) of Myers and Prausnitz.

### S3. Supporting Figures

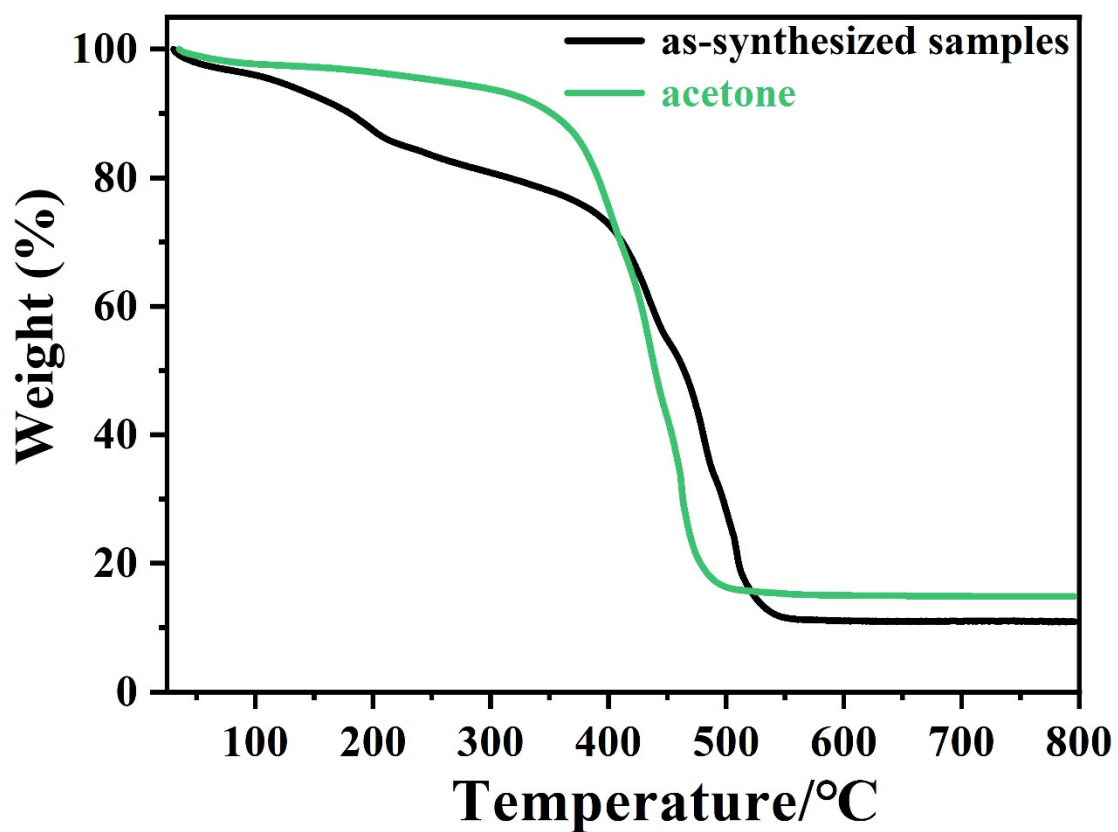

**Fig. S1** TGA curve of Hf-MOF for the as-synthesized samples. The high decomposition temperature reveals the notable thermal stability of the Hf-MOF, which can be assessed by thermo gravimetric analysis under an atmospheric environment.

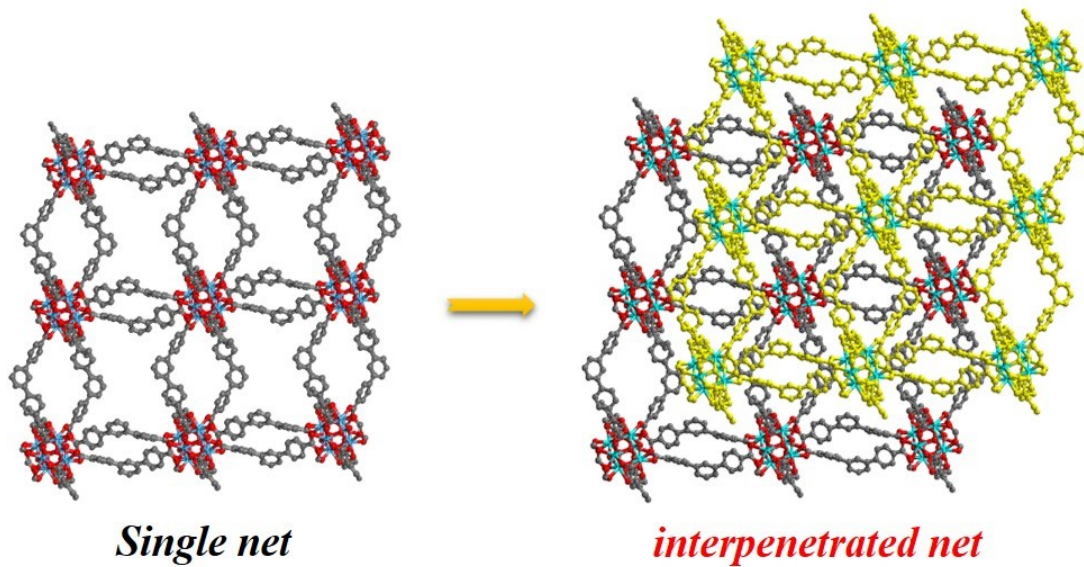

Fig. S2 The single net and interpenetrated net for the framework of Hf-MOF.

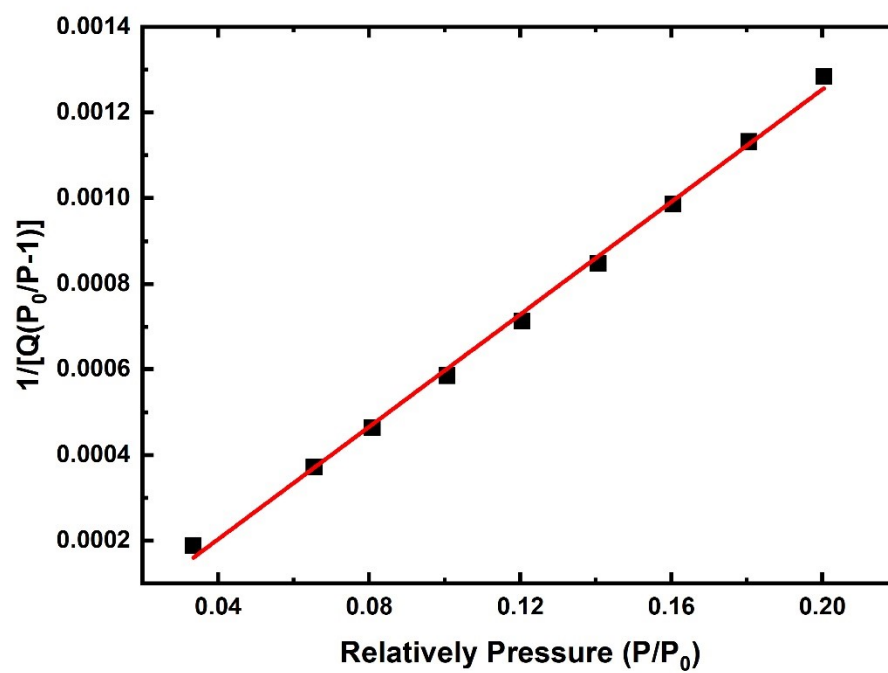

Fig. S3 The linear fitting curve for calculating BET surface areas of Hf-MOF.

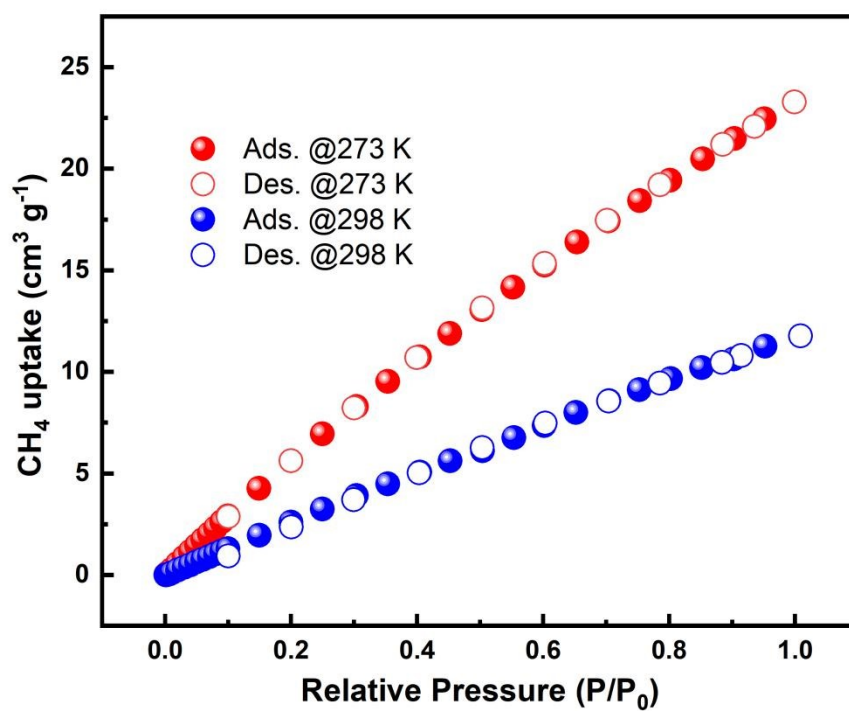

Fig. S4 The CH<sub>4</sub> isotherms for Hf-MOF at 273 and 298 K under 1 bar.

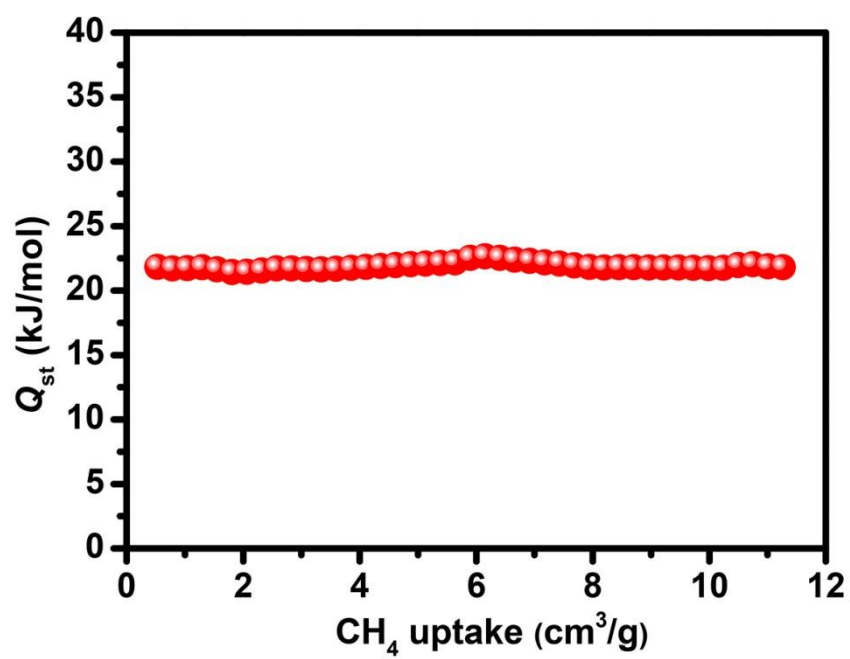

Fig. S5  $Q_{st}$  of  $CH_4$  for Hf-MOF.



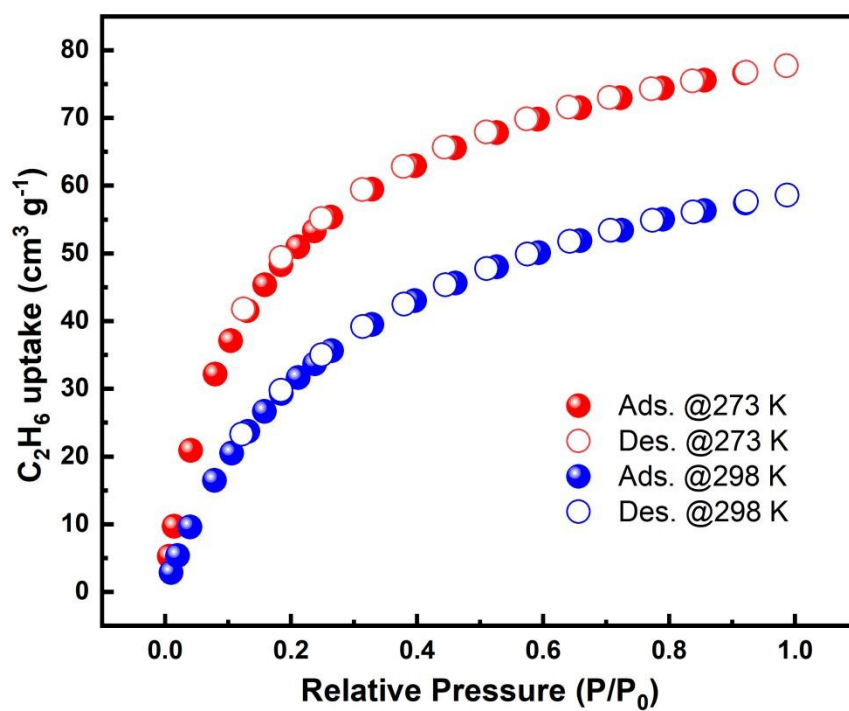

Fig. S6 The C<sub>2</sub>H<sub>6</sub> isotherms for Hf-MOF at 273 and 298 K under 1 bar.

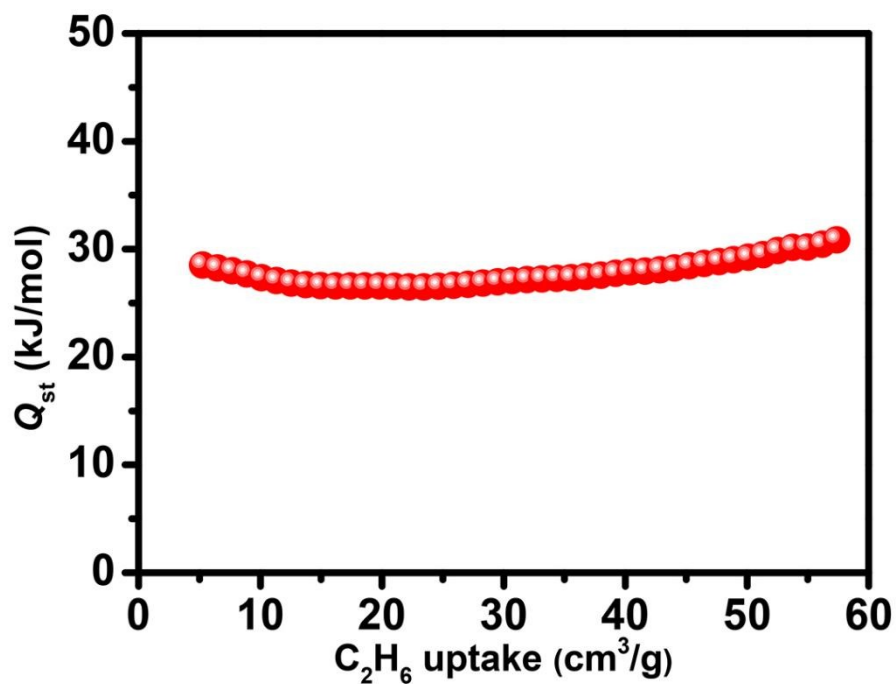

**Fig. S7**  $Q_{st}$  of  $C_2H_6$  for Hf-MOF. Furthermore, their gas adsorption ability for  $CH_4$  and  $C_2H_6$  were also investigated. As depicted in Fig. S3, the adsorption capacity for  $CH_4$  is 23 and 11  $cm^3 g^{-1}$  at 273 and 298 K under 1 atm, respectively. The adsorption capacity for  $C_2H_6$  is 77 and 58  $cm^3 g^{-1}$  at 273 and 298 K under 1 atm, respectively (Fig. S5). Calculated utilizing the virial model, the  $Q_{st}$  values of the Hf-MOF for  $CH_4$  and  $C_2H_6$  were determined to be 20 and 29  $kJ mol^{-1}$ .

**Table S1.** Selected bond lengths [ $\text{\AA}$ ] and angles [ $^\circ$ ] for **Hf-MOF**.

|            |           |                   |           |
|------------|-----------|-------------------|-----------|
| Hf(1)-O(1) | 2.129(4)  | C(5)-C(20)        | 1.464(16) |
| Hf(1)-O(2) | 2.208(7)  | C(6)-C(11)        | 1.403(17) |
| Hf(1)-O(3) | 2.208(8)  | C(7)-C(12)        | 1.351(17) |
| Hf(1)-O(4) | 2.190(7)  | C(8)-C(13)        | 1.376(16) |
| Hf(1)-O(5) | 2.120(9)  | C(8)-C(18)        | 1.413(18) |
| Hf(1)-O(6) | 2.185(8)  | C(9)-C(19)        | 1.390(16) |
| O(2)-C(4)  | 1.325(15) | C(9)-C(20)        | 1.396(17) |
| O(3)-C(1)  | 1.335(14) | C(10)-C(14)       | 1.377(15) |
| O(4)-C(4)  | 1.339(15) | C(10)-C(16)       | 1.338(16) |
| O(6)-C(1)  | 1.296(14) | C(11)-C(17)       | 1.389(17) |
| C(1)-C(14) | 1.509(17) | C(12)-C(17)       | 1.383(16) |
| C(2)-C(15) | 1.401(17) | C(14)-C(19)       | 1.357(16) |
| C(2)-C(18) | 1.390(17) | C(6)-C(5)-C(7)    | 119.6(13) |
| C(3)-C(11) | 1.428(16) | C(6)-C(5)-C(20)   | 119.1(13) |
| C(3)-C(13) | 1.402(17) | C(16)-C(20)-C(5)  | 125.6(12) |
| C(3)-C(15) | 1.365(18) | C(14)-C(19)-C(9)  | 121.2(13) |
| C(4)-C(18) | 1.445(16) | C(2)-C(18)-C(4)   | 121.1(13) |
| C(5)-C(6)  | 1.385(16) | C(12)-C(17)-C(11) | 121.5(13) |
| C(5)-C(7)  | 1.392(17) | C(8)-C(18)-C(4)   | 123.4(14) |

**Table S2.** The refined parameters for the Dual-site Langmuir-Freundlich equations fit for the pure isotherms of  $\text{CO}_2$ ,  $\text{CH}_4$  and  $\text{C}_2\text{H}_6$  for Hf-MOF at 298 K.

|                        | $q_{m1}$ | $b_1$   | $n_1$     | $q_{m2}$  | $b_2$   | $n_2$   | $R^2$   |
|------------------------|----------|---------|-----------|-----------|---------|---------|---------|
| $\text{CO}_2$          | 2.841272 | 1.90775 | 0.01327   | 0.00144   | 1.67858 | 0.91997 | 0.99998 |
| $\text{CH}_4$          | 14.62809 | 1.46471 | 9.7272E-6 | 0.01719   | 1.3754  | 1.54502 | 0.99994 |
| $\text{C}_2\text{H}_6$ | 15.22312 | 0.6929  | 0.00602   | 6.0276E-4 | 0.9391  | 2.9198  | 0.99999 |

**Table S3** CO<sub>2</sub> adsorption capacities and  $Q_{st}$  values in reported MOFs at 273 K and 1 bar.

| MOFs      | BET surface area<br>(m <sup>2</sup> g <sup>-1</sup> ) | CO <sub>2</sub> uptake<br>(273 K, cm <sup>3</sup> g <sup>-1</sup> ) | $Q_{st}$ values<br>(kJ mol <sup>-1</sup> ) | Ref.      |
|-----------|-------------------------------------------------------|---------------------------------------------------------------------|--------------------------------------------|-----------|
| Hf-MOF    | 639                                                   | 65                                                                  | 33                                         | This work |
| LIFM-28np | 940                                                   | 29.0                                                                | 22                                         | 1         |
| LIFM-79   | 1689                                                  | 76.3                                                                | 32                                         | 1         |
| LIFM-77   | 1619                                                  | 81.0                                                                | 34                                         | 1         |
| PCN-56    | 3741                                                  | ~58                                                                 | 20                                         | 2         |
| PCN-57    | 2572                                                  | ~50                                                                 | 22                                         | 2         |
| PCN-58    | 2185                                                  | ~63                                                                 | 24                                         | 2         |
| MOF-892   | 1431                                                  | ~41                                                                 | 24                                         | 3         |
| MOF-893   | 558                                                   | ~40                                                                 | 31                                         | 3         |
| JLU-MOF58 | 3663                                                  | 49                                                                  | 19                                         | 4         |
| PCN-138   | 1261                                                  | 63                                                                  | N.A.                                       | 5         |
| MIP-203-F | 430                                                   | 61                                                                  | 32                                         | 6         |
| MIP-203-S | no                                                    | 36                                                                  | 34                                         | 6         |
| MIP-203-M | 380                                                   | 48                                                                  | 33                                         | 6         |

**Table S4.** Comparison of CO<sub>2</sub>/CH<sub>4</sub> (0.5/0.5) selectivity of Hf-MOF with other MOFs materials.

| MOFs material                      | CO <sub>2</sub> /CH <sub>4</sub> selectivity | Ref.      |
|------------------------------------|----------------------------------------------|-----------|
| Hf-MOF                             | 6                                            | This work |
| MOF-177                            | 0.9                                          | 7         |
| ZIF-8                              | 1.4                                          | 7         |
| Cu <sub>3</sub> (BTC) <sub>2</sub> | 2.3                                          | 7         |
| NOTT-125                           | 4.8                                          | 8         |
| FJI-C1                             | 5.9                                          | 9         |
| ZJNU-59                            | 6.0                                          | 10        |
| NOTT-122                           | 6.4                                          | 11        |
| ZJNU-40                            | 6.6                                          | 12        |
| ZJNU-69                            | 7.1                                          | 13        |
| BSF-1                              | 7.5                                          | 14        |

**Table S5.** Comparison of C<sub>2</sub>H<sub>6</sub>/CH<sub>4</sub> (0.5/0.5) selectivity of Hf-MOF with other MOFs materials.

| MOFs material                                                     | C <sub>2</sub> H <sub>6</sub> /CH <sub>4</sub> selectivity | Ref.      |
|-------------------------------------------------------------------|------------------------------------------------------------|-----------|
| Hf-MOF                                                            | 75                                                         | This work |
| [Cu <sub>2</sub> (BTEB)(NMF) <sub>2</sub> ]·NMF·8H <sub>2</sub> O | 26                                                         | 15        |
| UTSA-35a                                                          | 8                                                          | 16        |
| Cu-TDPAT                                                          | 18                                                         | 17        |
| FIR-7a-ht                                                         | 15                                                         | 18        |
| JLU-5                                                             | 18                                                         | 19        |
| Cu <sub>2</sub> (bada) <sub>2</sub> (dabco)                       | 28                                                         | 20        |
| UPC-21                                                            | 15                                                         | 21        |
| MFM-202a                                                          | 9                                                          | 22        |
| S-PI-M-H                                                          | 19                                                         | 23        |
| JLU-Liu22                                                         | 14                                                         | 24        |

## References

1. C.-X. Chen, Z.-W. Wei, J.-J. Jiang, S.-P. Zheng, H.-P. Wang, Q.-F. Qiu, C.-C. Cao, D. Fenske and C.-Y. Su, *Journal of the American Chemical Society*, 2017, **139**, 6034-6037.
2. H.-L. Jiang, D. Feng, T.-F. Liu, J.-R. Li and H.-C. Zhou, *Journal of the American Chemical Society*, 2012, **134**, 14690-14693.
3. P. T. K. Nguyen, H. T. D. Nguyen, H. N. Nguyen, C. A. Trickett, Q. T. Ton, E. Gutiérrez-Puebla, M. A. Monge, K. E. Cordova and F. Gándara, *ACS Applied Materials & Interfaces*, 2018, **10**, 733-744.
4. X. Sun, J. Gu, Y. Yuan, C. Yu, J. Li, H. Shan, G. Li and Y. Liu, *Inorganic Chemistry*, 2019, **58**, 7480-7487.
5. Y.-C. Qiu, S. Yuan, X.-X. Li, D.-Y. Du, C. Wang, J.-S. Qin, H. F. Drake, Y.-Q. Lan, L. Jiang and H.-C. Zhou, *Journal of the American Chemical Society*, 2019, **141**, 13841-13848.
6. S. Wang, N. Xhaferaj, M. Wahiduzzaman, K. Oyekan, X. Li, K. Wei, B. Zheng, A. Tissot, J. Marrot, W. Shepard, C. Martineau-Corcoss, Y. Filinchuk, K. Tan, G. Maurin and C. Serre, *Journal of the American Chemical Society*, 2019, **141**, 17207-17216.
7. Z. Xiang, X. Peng, X. Cheng, X. Li and D. Cao, *The Journal of Physical Chemistry C*, 2011, **115**, 19864-19871.
8. N. H. Alsmail, M. Suyetin, Y. Yan, R. Cabot, C. P. Krap, J. Lü, T. L. Easun, E. Bichoutskaia, W. Lewis, A. J. Blake and M. Schröder, *Chemistry – A European Journal*, 2014, **20**, 7317-7324.
9. Y. Huang, Z. Lin, H. Fu, F. Wang, M. Shen, X. Wang and R. Cao, *ChemSusChem*, 2014, **7**, 2647-2653.
10. Y. Wang, M. He, X. Gao, S. Li, S. Xiong, R. Krishna and Y. He, *ACS Applied Materials & Interfaces*, 2018, **10**, 20559-20568.
11. Y. Yan, M. Suyetin, E. Bichoutskaia, A. J. Blake, D. R. Allan, S. A. Barnett and M. Schröder, *Chemical Science*, 2013, **4**, 1731-1736.
12. C. Song, Y. He, B. Li, Y. Ling, H. Wang, Y. Feng, R. Krishna and B. Chen, *Chemical Communications*, 2014, **50**, 12105-12108.
13. F. Chen, Y. Wang, D. Bai, M. He, X. Gao and Y. He, *Journal of Materials Chemistry A*, 2018, **6**, 3471-3478.

14. Y. Zhang, L. Yang, L. Wang, S. Duttwyler and H. Xing, *Angewandte Chemie International Edition*, 2019, **58**, 8145-8150.
15. X. Yu, Z. Huang, R. Krishna, X. Luo and Y. Liu, *Dalton Transactions*, 2023, **52**, 15101-15106.
16. Y. He, Z. Zhang, S. Xiang, F. R. Fronczek, R. Krishna and B. Chen, *Chemical Communications*, 2012, **48**, 6493-6495.
17. K. Liu, D. Ma, B. Li, Y. Li, K. Yao, Z. Zhang, Y. Han and Z. Shi, *Journal of Materials Chemistry A*, 2014, **2**, 15823-15828.
18. Y.-P. He, Y.-X. Tan and J. Zhang, *Chemical Communications*, 2013, **49**, 11323-11325.
19. D. Wang, T. Zhao, Y. Cao, S. Yao, G. Li, Q. Huo and Y. Liu, *Chemical Communications*, 2014, **50**, 8648-8650.
20. J. Qiao, X. Liu, X. Liu, X. Liu, L. Zhang and Y. Liu, *Inorganic Chemistry Frontiers*, 2020, **7**, 3500-3508.
21. M. Zhang, X. Xin, Z. Xiao, R. Wang, L. Zhang and D. Sun, *Journal of Materials Chemistry A*, 2017, **5**, 1168-1175.
22. S. Gao, C. G. Morris, Z. Lu, Y. Yan, H. G. W. Godfrey, C. Murray, C. C. Tang, K. M. Thomas, S. Yang and M. Schröder, *Chemistry of Materials*, 2016, **28**, 2331-2340.
23. J. Yan, B. Zhang and Z. Wang, *ACS Applied Materials & Interfaces*, 2018, **10**, 26618-26627.
24. D. Wang, B. Liu, S. Yao, T. Wang, G. Li, Q. Huo and Y. Liu, *Chemical Communications*, 2015, **51**, 15287-15289.
